# Supplementary material for: The Nucleoid Binding Protein H-NS Biases Genome-Wide Transposon Insertion Landscapes
Source: PubMed Central journal article supplement (PMC4999555; doi:10.1128/mbio.01351-16), 2016-08-30
Supplement: mbo004162965sf1.pdf [file mbo004162965sf1.pdf]

*V. parahaemolyticus*  
genome (4458)

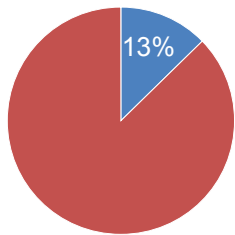

GC  $\geq$  40 %  
(4186)

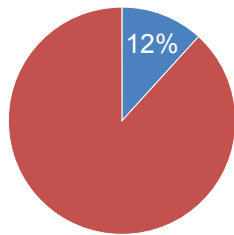

GC < 40 %  
(272)

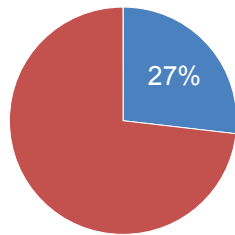

Classification in WT *V. parahaemolyticus*

■ Underrepresented

■ Neutral

## Supplementary Figure S1
