# Supplementary material for: The Nucleoid Binding Protein H-NS Biases Genome-Wide Transposon Insertion Landscapes
Source: PubMed Central journal article supplement (PMC4999555; doi:10.1128/mbio.01351-16), 2016-08-30
Supplement: mbo004162965sf2.pdf [file mbo004162965sf2.pdf]

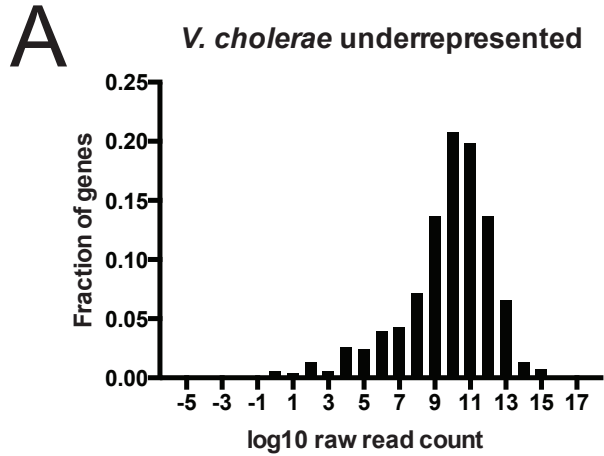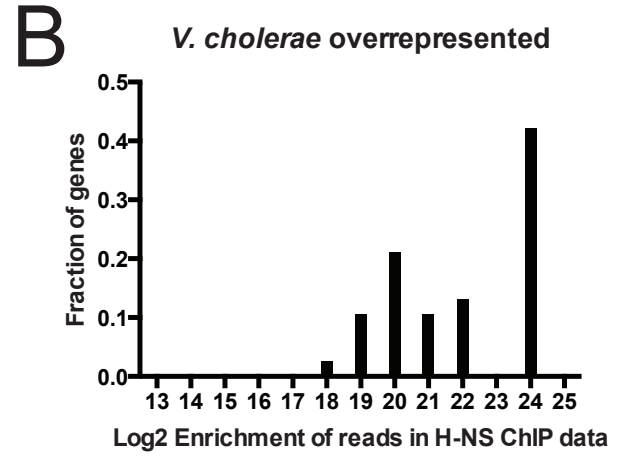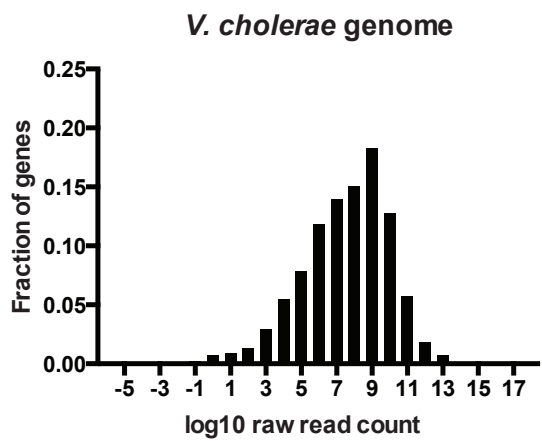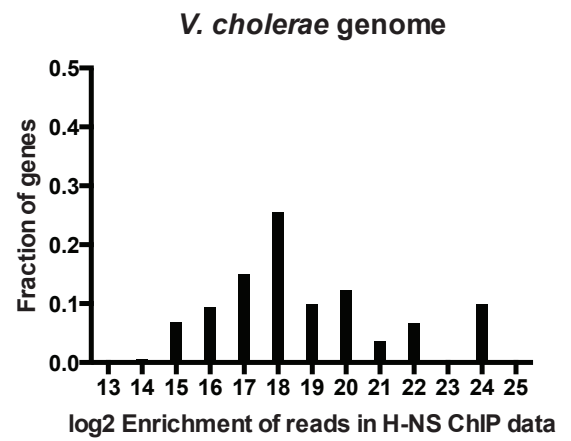

# Supplementary Figure S2
